# 1 **Transcriptional subtype-specific microenvironmental crosstalk and tumor cell** 2 **plasticity in metastatic pancreatic cancer**

3  
4 Srivatsan Raghavan<sup>1,2,3,4\*</sup>, Peter S. Winter<sup>1,2,5,6\*\*</sup>, Andrew W. Navia<sup>1,2,5,6,7\*</sup>, Hannah L. Williams<sup>1,3\*</sup>, Alan  
5 DenAdel<sup>8,9</sup>, Radha L. Kalekar<sup>1,2</sup>, Jennyfer Galvez-Reyes<sup>2,5,6</sup>, Kristen E. Lowder<sup>1,2</sup>, Nolawit Mulugeta<sup>2,5,6</sup>, Manisha  
6 S. Raghavan<sup>1,2</sup>, Ashir A. Borah<sup>2</sup>, Sara A. Väyrynen<sup>1</sup>, Addressa Dias Costa<sup>1,3</sup>, Raymond W.S. Ng<sup>1,2</sup>, Junning  
7 Wang<sup>1</sup>, Emma Reilly<sup>1</sup>, Dorisanne Y. Ragon<sup>1</sup>, Lauren K. Brais<sup>1</sup>, Alex M. Jaeger<sup>6</sup>, Liam F. Spurr<sup>1,2</sup>, Yvonne Y. Li<sup>1,2</sup>,  
8 Andrew D. Cherniack<sup>1,2</sup>, Isaac Wakiro<sup>1</sup>, Asaf Rotem<sup>1,2,10</sup>, Bruce E. Johnson<sup>1,3,4,10</sup>, James M. McFarland<sup>2</sup>, Ewa T.  
9 Sicinska<sup>1,3</sup>, Tyler E. Jacks<sup>6</sup>, Thomas E. Clancy<sup>1,3,11</sup>, Kimberly Perez<sup>1,3,4</sup>, Douglas A. Rubinson<sup>1,3,4</sup>, Kimmie Ng<sup>1,3,4</sup>,  
10 James M. Cleary<sup>1,3,4</sup>, Lorin Crawford<sup>8,12</sup>, Scott R. Manalis<sup>6,13</sup>, Jonathan A. Nowak<sup>3,14,15</sup>, Brian M. Wolpin<sup>1,3,4</sup>,  
11 William C. Hahn<sup>1,2,3,4</sup>†, Andrew J. Aguirre<sup>1,2,3,4</sup>#, Alex K. Shalek<sup>2,3,5,6,7,16</sup>†#

12  
13 <sup>1</sup>Department of Medical Oncology, Dana-Farber Cancer Institute, Boston, MA

14 <sup>2</sup>Broad Institute of MIT and Harvard, Cambridge, MA

15 <sup>3</sup>Harvard Medical School, Boston, MA

16 <sup>4</sup>Department of Medicine, Brigham and Women's Hospital, Boston, MA

17 <sup>5</sup>Institute for Medical Engineering & Science, Massachusetts Institute of Technology, Cambridge, MA

18 <sup>6</sup>Koch Institute for Integrative Cancer Research, Massachusetts Institute of Technology, Cambridge, MA

19 <sup>7</sup>Department of Chemistry, Massachusetts Institute of Technology, Cambridge, MA

20 <sup>8</sup>Center for Computational Molecular Biology, Brown University, Providence, RI

21 <sup>9</sup>Division of Applied Mathematics, Brown University, Providence, RI

22 <sup>10</sup>Center for Cancer Genomics, Dana-Farber Cancer Institute, Boston, MA

23 <sup>11</sup>Department of Surgery, Brigham and Women's Hospital, Boston, MA

24 <sup>12</sup>Department of Biostatistics, Brown University, Providence, RI

25 <sup>13</sup>Department of Biological Engineering, Massachusetts Institute of Technology, Cambridge, MA

26 <sup>14</sup>Department of Oncologic Pathology, Dana-Farber Cancer Institute, Boston, MA

27 <sup>15</sup>Department of Pathology, Brigham and Women's Hospital, Boston, MA

28 <sup>16</sup>Ragon Institute of MGH, MIT, and Harvard, Cambridge, MA

29  
30 \*Equal first author contribution

31 †Equal senior contribution

32 #To whom correspondence should be addressed:

33 Peter S. Winter, Ph.D., [pswinter@mit.edu](mailto:pswinter@mit.edu)

34 Andrew J. Aguirre, M.D., Ph.D., [andrew\\_aguirre@dfci.harvard.edu](mailto:andrew_aguirre@dfci.harvard.edu)

35 Alex K. Shalek, Ph.D., [shalek@mit.edu](mailto:shalek@mit.edu)

## 37 **ABSTRACT**

38  
39 In pancreatic ductal adenocarcinoma (PDAC), the basal-like and classical transcriptional subtypes are  
40 associated with differential chemotherapy sensitivity and patient survival. These phenotypes have been defined  
41 using bulk transcriptional profiling, which can mask underlying cellular heterogeneity and the biologic  
42 mechanisms that distinguish these subtypes. Furthermore, few studies have interrogated metastases, which are  
43 the cause of mortality in most patients with this highly lethal disease. Using single-cell RNA-sequencing of  
44 metastatic needle biopsies and matched organoid models, we demonstrate intra-tumoral subtype heterogeneity  
45 at the single-cell level and define a continuum for the basal-like and classical phenotypes that includes hybrid  
46 cells that co-express features of both states. Basal-like tumors show enrichment of mesenchymal and stem-like  
47 programs, and demonstrate immune exclusion and tumor cell crosstalk with specific macrophage subsets.  
48 Conversely, classical tumors harbor greater immune infiltration and a relatively pro-angiogenic  
49 microenvironment. Matched organoid models exhibit a strong bias against the growth of basal-like cells in  
50 standard organoid media, but modification of culture conditions can rescue the basal-like phenotype. This study  
51 reframes the transcriptional taxonomy of PDAC, demonstrates how divergent transcriptional subtypes associate  
52 with unique tumor microenvironments, and highlights the importance of evaluating both genotype and  
53 transcriptional phenotype to establish high-fidelity patient-derived cancer models.

## 54 55 56 **MAIN**

57  
58 While classification of human malignancies by genotype has provided critical structure for understanding tumor  
59 biology, tumors can also harbor clinically relevant variation in transcriptional phenotypes.<sup>1</sup> Indeed, for several  
60 malignancies such as pancreatic ductal adenocarcinoma (PDAC), classification based on RNA expression has  
61 emerged as a genotype-independent predictor of chemotherapy sensitivity and patient survival.<sup>2-6</sup> In PDAC, bulk  
62 transcriptional profiling has defined two major transcriptional subtypes, basal-like/squamous (hereafter referred  
63 to as “basal”) and classical, where the former is associated with worse prognosis and greater treatment  
64 resistance.<sup>3-5,7-14</sup> However, classification based on bulk expression profiling can obscure clinically relevant  
65 cellular attributes because it reduces signals from multiple cell types to a single, whole sample average. In reality,  
66 PDAC tumors, like many other cancers, are complex multicellular ecosystems shaped by both malignant and  
67 microenvironmental features. Unlike in DNA sequencing where mutant and normal reads can be precisely  
68 separated, malignant and non-malignant signals in bulk RNA profiles are not easily disentangled, making  
69 conclusions about their relationships challenging.

70 The recent application of single-cell RNA-sequencing (scRNA-seq) to human cancers has revealed that  
71 the tumor ecosystem is highly heterogeneous and often consists of continuous phenotypes within both malignant  
72 and non-malignant populations.<sup>15-21</sup> The precise cellular characterization this method affords has enabled the re-  
73 examination of transcriptional taxonomies and reframed our understanding of the summaries provided by bulk

74 measurements in multiple cancers.<sup>15,21-26</sup> Such enhanced resolution may be particularly useful in PDAC, where  
75 neoplastic cellularity is generally low and stromal content is high. Understanding the distribution and plasticity of  
76 malignant and non-malignant states within individual PDAC tumors has important implications for the  
77 interpretation of transcriptional subtypes, directing therapy, and monitoring tumor evolution. However, few single-  
78 cell studies have been conducted in human PDAC, and these have largely focused on stromal cell types or  
79 provided a limited analysis of malignant cells.<sup>11,27-29</sup> We therefore lack a harmonized view of the interplay between  
80 malignant transcriptional subtypes and their associated tumor microenvironment (TME).

81 Our current understanding of PDAC is largely derived from resected primary tumors.<sup>12,13,30</sup> However, the  
82 majority of patients with PDAC present with, and succumb to, metastatic disease, which occurs most commonly  
83 in the liver.<sup>30</sup> At present, we have little information about the cellular phenotypes and microenvironmental  
84 interactions in metastatic lesions. Tissue availability has been a key barrier to enhanced understanding of  
85 metastatic disease, as needle biopsies provide an important but cell-limited window into the biology of the  
86 metastatic niche.

87 In conjunction with detailed molecular analysis of patient samples, reliable *ex vivo* models are needed to  
88 functionally test clinical and molecular observations. For this purpose, human cancer cell line models are  
89 frequently utilized, as is the case in PDAC. However, the methods to generate new cell lines from human tissue  
90 are generally inefficient, which limits their utility in personalized medicine.<sup>31</sup> Moreover, once established, cell  
91 lines can display significant drift in culture.<sup>32</sup> To address these limitations, several groups have established  
92 efficient methods for generating patient-derived organoid cultures from PDAC tissue with the goal of modeling  
93 an individual patient's disease.<sup>10,33-35</sup> However, few studies have examined the fidelity and evolution of organoid  
94 phenotype and genotype relative to the parental patient tissue.

95 Here, we developed and employed an optimized translational workflow to perform both high-resolution  
96 profiling of patient tissue using scRNA-seq via Seq-Well<sup>36</sup> and derivation of matched organoid models from the  
97 same metastatic core needle biopsy. Through this approach we reframe bulk classifications by clarifying the  
98 underlying distribution of malignant phenotypes, reveal how microenvironmental heterogeneity is distributed in  
99 a transcriptional subtype-dependent manner, and systematically evaluate the *ex vivo* evolution and plasticity of  
100 malignant phenotypes.

## 101 RESULTS

### 102 A clinical pipeline for matched single-cell profiling and organoid model generation

103  
104 We established a pipeline for collecting needle biopsies from patients with metastatic PDAC (n=23) to generate  
105 matched scRNA-seq profiles and organoid models (**Figure 1a, Extended Data Figure 1a, Supplementary**  
106 **Table 1**). Most samples were obtained from metastatic lesions residing in the liver (19/23), and the majority  
107 (21/23) were analyzed by targeted DNA-sequencing which yielded the expected mutational pattern for this  
108 disease (**Extended Data Figure 1a**).<sup>4,12,13</sup> After tissue dissociation, we used 10,000-20,000 viable cells for  
109  
110

111 scRNA-seq via Seq-Well, and the remainder were seeded for organoid culture (**Figure 1a**). This pipeline yielded  
112 approximately 1,000 high-quality single cells per biopsy (n=23,042 total cells) and successful early-passage  
113 organoid cultures from 70% (16/23) of patient tumor samples (**Extended Data Figure 1a, b**). Dimensionality  
114 reduction and shared nearest neighbor (SNN) clustering of the biopsy cells revealed substantial heterogeneity  
115 at the single-cell level (**Extended Data Figure 1c; Methods**). The fractional representation from each biopsy  
116 readily split the data into two groups, clusters of admixed cells from multiple patients and distinct patient-specific  
117 clusters (**Extended Data Figure 1d**). This pattern suggested both malignant and non-malignant cells within each  
118 biopsy, with patient-specific clusters driven by specific copy number variations (CNVs). To confirm malignant cell  
119 identity, we inferred transcriptome-wide CNVs from our single-cell data as previously described.<sup>21,26</sup> CNV  
120 alteration scores separated putative malignant and non-malignant cells in each biopsy and demonstrated high  
121 concordance with reference targeted DNA-seq (**Figure 1b, c; Extended Data Figure 2a, b**). CNV analysis  
122 paired with manual inspection of expression patterns for known markers across single cells supported the  
123 identification of malignant cells as well as 11 unique non-malignant cell types (**Extended Figure 1d-f; Figure**  
124 **1d, e; Supplementary Table 2**). Thus, we established a robust workflow capable of recovering high quality  
125 malignant (n=7,740) and non-malignant (n=15,302) populations from metastatic PDAC needle biopsies with low  
126 neoplastic cellularity while also enabling simultaneous generation of matched organoid models.

### 127 128 **PDAC transcriptional subtypes exist on a continuum and include hybrid expression states**

129  
130 We first applied principal component analysis (PCA) to examine major axes of transcriptional variation across  
131 malignant cells from all biopsy samples. Notably, we failed to identify canonical driver mutations typically  
132 observed in PDAC in one patient sample obtained prior to a pathologically confirmed clinical diagnosis,  
133 PANFR0580 (**Extended Data Figure 1a**); however, we detected a significant fraction of putative malignant cells  
134 (n=662) in this biopsy (**Extended Data Figure 2b**). Principal component 1 (PC1) separated PANFR0580 from  
135 all other tumors in our cohort (**Extended Data Figure 3a, top**). Genes with the strongest negative loading on  
136 PC1 were indicative of a neuroendocrine phenotype (*TTR*, *CHGA*, *CHGB*; **Extended Data Figure 3a, bottom**)  
137 and subsequent pathological evaluation confirmed that this sample was a pancreatic neuroendocrine tumor  
138 (PanNET). To focus on transcriptional heterogeneity among PDAC samples, we removed the PanNET cells and  
139 performed a new PCA on the remaining 7,078 malignant cells. Inspection of the genes driving the first 3 PCs  
140 within PDAC cells revealed separation along previously characterized transcriptional phenotypes  
141 (epithelial/mesenchymal transition (EMT)<sup>37</sup>, PC1; basal/classical<sup>5</sup>, PC2; cell cycle<sup>16</sup>, PC3; **Extended Data Figure**  
142 **3b,c**), confirming that the main axes of variation in our data align with established transcriptional subtypes.

143 Previous studies using bulk RNA-seq data have converged on two main tumor subtypes, basal and  
144 classical.<sup>3-5,11-13</sup> Collapsing the malignant cells from each sample into a pseudo-bulk averaged transcriptome split  
145 our cohort into 3 groups: those that exhibit predominately basal character (n=7), those with more classical  
146 features (n=4), and those that are intermediate (n=10; **Extended Data Figure 3d**). Examination of basal and  
147 classical phenotypes within each biopsy at single-cell resolution suggested that tumors are comprised of a

heterogenous mixture of states, likely driving the ambiguous classification of weakly polarized tumors when using hierarchical clustering (**Extended Data Figure 3d,e**). We also observed a significant fraction of malignant cells co-expressing both basal and classical phenotypes, hereafter referred to as “hybrid” cells (~13% of malignant cells, **Figure 2a**, see **Methods**), suggesting that these phenotypes exist on a continuum rather than as discrete states. Classification of each single cell as basal, classical, or hybrid revealed substantial heterogeneity across individual tumors for these phenotypes (**Figure 2b**). These observations underscore the difficulty in assigning intermediate tumors exclusively to basal or classical groups.<sup>11</sup> Thus, where discrete binning was necessary, we employed a basal-classical “score difference” to stratify samples and preserve the polarization for each tumor along this continuum (**Extended Data Figure 3f**).

We also used our single-cell data to examine signatures proposed by other bulk RNA sequencing studies to clarify their inter-relationships. Pairwise correlation of all established signatures in malignant cells revealed that many contribute overlapping information and reflect similar underlying biology (**Extended Data Figure 3g**). We observed that cells with higher basal expression were also classified as squamous and quasimesenchymal, while cells with classical signatures were correlated with the pancreatic progenitor subtype (**Extended Data Figure 3g,h**).<sup>3,4</sup> By contrast, we did not observe evidence for expression of the immunogenic, ADEX, or exocrine-like transcriptional signatures in malignant cells.<sup>3,4</sup> While the absence of these signatures might represent differences between primary and metastatic disease, these bulk RNA profiles also likely incorporate signals from non-malignant cells in the TME. In support of the latter hypothesis, we find evidence of immunogenic signature expression originating from plasma cells as well as EMT signature expression from both malignant cells and fibroblasts (**Extended Data Figure 3h**). These patterns underscore the need for single-cell resolution to dissect malignant and non-malignant contributions to transcriptional signatures.

We next confirmed the presence of basal, classical, and hybrid cells using a novel subtype-specific single-cell multiplexed immunofluorescence (mIF) panel in a cohort of primary resected PDAC (n=15 cases, 46,234 cells, **Methods**; **Figure 2c**; **Extended Data Figure 4a-c**, **Supplementary Tables 3, 4**). This orthogonal approach confirmed the intratumoral heterogeneity observed in our scRNA-seq cohort and revealed that PDAC transcriptional subtype diversity occurs on two levels: (i) “mixed” tumors comprised of discrete cells with differing subtype identity, and (ii) hybrid cells which co-express basal and classical programs. These observations indicate that PDAC transcriptional subtypes exist on a continuum, with mixed and hybrid phenotypes occurring even within a single tumor gland (**Figure 2d**).

## **Basal and classical cells exhibit subtype-specific expression programs**

We next leveraged our single-cell resolution to examine whether specific tumor cell gene expression programs were correlated with either the basal or classical phenotypes. This correlation analysis across malignant cells revealed 1,909 genes significantly associated with either basal or classical expression scores (**Figure 2e**; **Supplementary Tables 5,6**; **Methods**). Inspection of these genes revealed basal cells are defined by more mesenchymal features and co-express programs associated with transforming growth factor beta (*TGFB2*,

185 *SERPINE1*; TGF- $\beta$ ) signaling, interferon response (*IFI44L*, *ISG15*; IFN<sub>Resp</sub>), WNT signaling (*WNT7B*, *FZD6*,  
186 *EPHB2*; WNT), and cell cycle progression (*NASP*, *TOP2A*).<sup>37-40</sup> Notably, these patterns are concordant with  
187 larger bulk RNA-seq cohorts from primary and metastatic patient samples (**Figure 2e,f; Extended Data Figure**  
188 **5a,b**).<sup>12,13</sup> While WNT ligands are included in organoid culture media and thought to be necessary to support  
189 tumor cell growth *ex vivo*, we consistently detected only the WNT ligands *WNT7B* and *WNT10A*, which are  
190 enriched in malignant basal cells *in vivo* (**Extended Data Figure 5c**).<sup>33,41</sup> Conversely, epithelial and pancreatic  
191 progenitor transcriptional programs are enriched in classical PDAC cells (**Figure 2e,f; Extended Data Figure**  
192 **5a**). Together, these expression patterns suggest a developmental continuum within PDAC tumors from higher  
193 cycling (**Figure 2a**), de-differentiated basal cells to more committed classical epithelial pancreatic progenitors  
194 that mirror phenotypes seen in the early developing pancreas.

### 196 **Transcriptional subtypes associate with distinct immune microenvironments**

197  
198 Relatively little is known about the structure and composition of the metastatic microenvironment in PDAC, and,  
199 more specifically, about how non-malignant heterogeneity associates with the basal to classical continuum. To  
200 characterize the cell types in the metastatic niche, we analyzed the non-malignant cells (n=12,830) and refined  
201 our broad cell-typing scheme from **Figure 1d** by further subdividing the T/NK cells, monocytes/macrophages,  
202 and fibroblasts (**Figure 3a,b**). First, a closer analysis of the T/NK cell cluster revealed 5 cell types—*CD4+* T,  
203 *CD8+* T, NKT, NK, and *CD16+* (*FCGR3A+*) NK cells—each expressing the corresponding established markers  
204 (**Extended Data Figure 6a-d**). Similarly, an unsupervised examination within the monocyte/macrophage  
205 compartment revealed a tumor associated macrophage (TAM) continuum similar to one recently described in  
206 colorectal cancer.<sup>42,43</sup> The first two PCs readily identified 3 TAM subsets: “monocyte-like” *FCN1+*, *C1QC+*, and  
207 *SPP1+* macrophages (**Extended Data Figure 6h**). *FCN1+* “monocyte-like” cells expressed high levels of *IL1B*  
208 and *CCR2* and shared some features with *CD14+* blood monocytes (*CD300E*, *S100A8*).<sup>42</sup> *C1QC+* TAMs  
209 resembled a phagocytic phenotype (*CD163*, *MERTK*), but also demonstrated preferentially high expression of  
210 antigen presentation genes (*HLA-DRB1*, *CD74*) and genes described in anti-inflammatory macrophage subsets  
211 (*FOLR2*, *CD209*, *AXL*, *CSF1R*). Conversely, *SPP1+* TAMs expressed gene programs associated with  
212 angiogenesis (*SPP1*, *FLT1*) and inflammatory response (*CCL2*, *CCL7*, *CSF1*, *CLEC5A*). A fourth subset was  
213 positioned as intermediate between these three phenotypes and likely represents a population of actively  
214 transitioning/differentiating TAMs (Trans TAM; **Extended Data Figure 6h-j**).<sup>42</sup> Finally, although several scRNA-  
215 seq studies in primary resected PDAC have focused on fibroblast phenotypes, we observed few fibroblasts per  
216 tumor (**Methods**), with the outliers coming from sampling sites other than the liver (PANFR0637 and  
217 PANFR0635) or from a different disease etiology (PANFR0580, PanNET; **Extended Data Figure 6k**).<sup>27-29</sup> Still,  
218 in the fibroblasts we recovered we noted evidence of previously identified subtypes including myofibroblastic and  
219 inflammatory cancer-associated fibroblasts (myCAFs and iCAFs, respectively) in this metastatic setting  
220 (**Extended Data Figure 6l,m**). Taken together, we identified 18 unique cell types/states in the PDAC metastatic  
221 microenvironment (**Figure 3a**).

222 We next determined whether the 18 non-malignant cell types/states were represented evenly across the  
223 malignant basal-to-classical transcriptional continuum described in **Figure 2**. For this analysis, we computed two  
224 quantities: 1) the fractional representation of each non-malignant cell type per biopsy and 2) the correlation of  
225 each non-malignant cell type's capture frequency to the average "score difference" (basal/classical polarization;  
226 **Extended Data Figure 3f**) derived from the malignant cells in the same biopsy. Cross-correlation of each cell  
227 type's fractional representation revealed two distinct patterns that largely diverged by malignant transcriptional  
228 subtype association (**Figure 3c**). Overall, cell types traditionally believed to facilitate a more immune-responsive  
229 microenvironment were frequently captured together. For example, DC subsets, NK, B, *CD4+* T and  
230 inflammatory *FCN1+* TAMs derive from shared microenvironments (hereafter "immune-infiltrated") and tend to  
231 associate with more classical tumors (**Figure 3c**). Activated, mature NK cells (*FCGR3A+* NK) were captured  
232 most often from these immune-infiltrated biopsies and showed a strong correlation with classical tumors (**Figure**  
233 **3d**). Interestingly, *FCGR3A+* NK cells showed the highest expression of cytotoxic markers in our metastatic  
234 dataset, even compared to *CD8+* T cells (**Extended Data Figure 6e,f**). Examination of the T cell compartment  
235 revealed that *CD4+* T cells were captured more frequently in classical tumors (**Figure 3c,e**), whereas *CD8+* T  
236 cells were captured less frequently in immune-infiltrated biopsies and associated more often with an increased  
237 basal score. PCA within the *CD8+* compartment revealed a progenitor (*TCF7*, *IL7R*) to differentiated/exhausted  
238 (*HAVCR2*, *ENTPD1*) continuum previously associated with differential outcomes to immune checkpoint blockade  
239 (**Extended Data Figure 6g**).<sup>20,44</sup> Scoring each *CD8+* T cell over this axis, we observed a progenitor-restricted  
240 distribution in most tumors, with only two outlier basal tumors skewing toward more differentiated/exhausted  
241 phenotypes (**Figure 3e**). In sum, these findings indicate that much of the cytotoxic activity in the metastatic niche  
242 may originate from the innate immune system by way of activated NK cells in the microenvironment of classical  
243 tumors.

244 Along with differences in lymphocyte content, the myeloid compartment, specifically TAM phenotypes,  
245 showed strong subtype-specific associations. First, we noted selective skewing for the types of TAMs originating  
246 from basal versus classical tumors (**Extended data figure 6i**,  $P < 2.2 \times 10^{-16}$ , Chi-squared test; **Figure 3c**, *C1QC+*  
247 TAM,  $r = -0.59$ , basal association and *SPP1+* TAM,  $r = 0.52$ , classical association). Indeed, when examining the  
248 monocyte-like to macrophage distribution for TAMs from individual liver biopsies, the most basal-polarized  
249 tumors were associated with more macrophage-committed phenotypes (**Figure 3f**). Moreover, by scoring each  
250 macrophage using TAM subtype-specific signatures and visualizing them with respect to the likely differentiation  
251 trajectory inferred from recent studies (**Supplementary Tables 7-9; Methods**)<sup>42</sup>, we confirm a preferential  
252 association between *C1QC+* TAMs and basal tumors and, conversely, an enrichment for the inflammatory  
253 *FCN1+* monocyte-like and *SPP1+* TAM subsets in tumors with intermediate and classical phenotypes (**Figure**  
254 **3g**). In addition to demonstrating that classical tumors are relatively more immune infiltrated, this analysis also  
255 identifies distinct microenvironmental phenotypes that co-vary with each PDAC transcriptional subtype and  
256 suggests opportunities to direct microenvironmental therapies in a subtype-specific manner.

## 258 Differential microenvironmental signaling shapes subtype-specific metastatic niches

259

260 Given the striking compositional differences we observed in the immune microenvironment across the basal to  
261 classical axis, we next searched for tumor-secreted factors that might influence the structure of the local  
262 metastatic niche. Specifically, we analyzed subtype-specific expression patterns for genes detected in malignant  
263 cells that were annotated as secreted factors (cytokines, chemokines, growth factors by Gene Ontology; n=218  
264 genes). This analysis nominated 57 basal (orange) and 23 classical-associated (blue) secreted factors (**Figure**  
265 **4a**). Gene set enrichment analysis (GSEA) demonstrated that basal tumors were enriched for genes associated  
266 with growth factor secretion, while classical tumors were enriched for cytokine/chemokine signaling (**Figure 4b**).  
267 We observed expression of multiple TGF ligands secreted by basal tumors, consistent with the association of  
268 increased TGF- $\beta$  signaling in basal tumors (**Figure 2f**) and local immune suppression/exclusion. Conversely,  
269 several chemokines (*CXCL5*, *CXCL3*) were enriched in classical tumors in agreement with their overall higher  
270 degree of immune infiltration and higher fraction of endothelial cells (**Figure 3c**). As such, classical tumors  
271 expressed higher levels of *CXCL5* which plays a documented role in enhancing tumor-supportive  
272 angiogenesis.<sup>45,46</sup> Consistent with this finding, we observed a strong positive correlation between high average  
273 malignant cell expression of *CXCL5* and the fraction of endothelial cells recovered (**Figure 4c**). In basal tumors,  
274 we noted increased expression of the ligands *CSF1* and *IL34* (**Figure 4a**) and concomitant expression of their  
275 receptor, *CSF1R*, in the basal-associated *C1QC+* TAMs (**Figure 3c,g; 4d**). Per-tumor analysis revealed a  
276 continuum of *C1QC+* TAM distribution within basal tumors that correlated with high *CSF1R* expression (**Figure**  
277 **4e,f top**). Malignant cells with strong EMT features (PANFR0545, PANFR0593) expressed the highest levels of  
278 *CSF1* and *IL34*, consistent with a role for tumor cells in shaping their local macrophage phenotypes (**Figure 4f**  
279 **bottom**). To extend this finding in larger cohorts, we analyzed bulk RNA-sequencing of primary and metastatic  
280 PDAC tumors for markers of transcriptional subtype, TAM, and tumor secretion phenotypes.<sup>12,13</sup> Consistent with  
281 our single-cell observations, macrophage markers and the ligands *CSF1* and *IL34* were associated with basal  
282 but not classical markers in these samples (n=198, **Figure 4g**). Together, these data provide evidence that  
283 subtype-specific intercellular crosstalk shapes distinct niches in the metastatic microenvironment.

284

## 285 **Genotype and phenotype evolution of matched patient-derived organoid models**

286

287 Our observations indicate that basal and classical phenotypes exist along a continuum and exhibit distinct  
288 patterns of reciprocal interaction with their local microenvironments. To examine how tumor cell phenotypes  
289 adapt and evolve in *ex vivo* microenvironments, we utilized the matched organoid models generated from our  
290 metastatic biopsy cohort (**Methods**). For most models, we obtained scRNA-seq samples at the earliest passage  
291 possible, typically passage 2 (P2), and again at a later passage (**Extended Data Figure 7a,b**). Notably, only  
292 33% of models derived from basal tumors propagated beyond passage 2, whereas 60% of models derived from  
293 classical tumors established long-term cultures (**Extended Data Figure 7b**). Globally, unbiased analysis of  
294 malignant biopsy (7,078 cells) and organoid cells (n=14 models, 24,789 cells) revealed that biopsy cells clustered  
295 separately from their matched organoid counterparts (**Extended Data Figure 7c,d**). Only two clusters were



admixed by donor and originated from early passage organoids (clusters 4 and 32; **Extended Data Figure 7c**). These clusters were defined by expression patterns consistent with fibroblasts (cluster 32) and poorly differentiated epithelial cells (cluster 4), and were not seen in samples from later passages (**Extended Data Figure 7e,f**).

Comparison of transcriptional phenotypes revealed a striking selection against the basal subtype in organoid culture despite it being the higher cycling subset *in vivo* (**Figure 2a & Figure 5a**). To understand the relative contribution of genotype versus phenotype to this bottleneck, we computed the average single-cell genotype (CNV) and phenotype (basal versus classical) correlation distance ( $d$ ) between each biopsy and its matched early passage organoid (**Figure 5b; Methods**). Six models, all classical, did not significantly deviate along either the CNV or transcriptional axes outside the expected distance for highly similar samples (intra-biopsy  $d$  across the cohort; dotted line,  $P < 0.05$  for both metrics). Another group, largely basal (right of x-axis dotted line), deviated significantly from their original biopsies along the transcriptional but not the CNV axis. Finally, two basal models (PANFR0545 and PANFR0552) exhibited the strongest deviation from their parent biopsies along both axes (**Figure 5b**, upper right). This analysis demonstrated that early passage organoid models largely maintain genomic features observed in parental tumor tissue, but over half of these models, and in particular models derived from basal tumors, were significantly divergent in phenotype compared to their matched tissue-of-origin.

We next examined the subclonal hierarchies within each biopsy-organoid pair. This single-cell comparative analysis identified 4 broad patterns of drift/selection. Pattern 1 consisted of tumors ( $n=4$ ) where the organoids failed to grow beyond P2; the majority of these were derived from basal tumors (3/4 models), and included the two models (PANFR0545 and PANFR0552) that deviated the most genotypically and phenotypically from their parent biopsies (**Extended Data Figure 8a**). Of the models that propagated beyond P2, Pattern 2 models ( $n=3$ ) showed evidence of selective outgrowth wherein models derived from basal tumors enriched rare subclones tied to more classical or less basal phenotypes (**Extended Data Figure 8b**). In contrast, models within Pattern 3 ( $n=5$ ) were typified by neutral outgrowth (no overt selection) where the dominant clone(s) in the biopsy grew out in the organoid (**Extended Data Figure 8c**). These models expressed predominantly classical phenotypes and had the least overall deviation from their parent biopsies (**Figure 5b**); none of the models derived from basal tumors displayed this pattern. Finally, Pattern 4 comprised one basal biopsy-organoid pair (PANFR0575) that demonstrated phenotypic plasticity with nearly identical CNVs but a divergent transcriptional phenotype in organoid culture (**Extended Data Figure 8d**). These data illustrate the dramatic adaptation that organoid models undergo *ex vivo* via transcriptional and clonal selection at early passages, especially when derived from basal tumors.

When we serially sampled and assessed organoid phenotypes over time, we observed that each model assumed a more classical phenotype regardless of its parent tumor's transcriptional identity, and only the Pattern 4 plastic model, PANFR0575, re-acquired its basal phenotype at a later passage (**Figure 5c, d**). Linked genotype and phenotype assessment from iterative passages provided evidence for significant evolution along both CNV and transcriptional axes over time in culture (**Figure 5e; Extended Data Figure 8e**). After identifying CNV-

333 defined subclones in the parental biopsy and its associated serial organoid samples (**Figure 5e**; clones A-F;  
334 **Methods**), we related cells that were similar in genotype (e.g., all cells within clone A) to their corresponding  
335 transcriptional phenotype. In sample PANFR0575 (**Figure 5e**), we observed examples of transcriptional plasticity  
336 at early passages within clone A. Cells derived from the parental biopsy were basal, but all other cells in this  
337 subclone derived from organoids had classical phenotypes. Interestingly, with successive passaging, several  
338 subclones emerged with hybrid and basal phenotypes (clones D and E). While model PANFR0575 is a unique  
339 case, it highlights the various ways organoids can evolve in culture, including via transcriptional plasticity (clone  
340 A) and the late emergence of rare subclones (clones D and E). In contrast, PANFR0489R was initially basal, but  
341 we observed clonal selection and phenotypic drift toward classical states, as seen in most other models (**Figure**  
342 **5c**; **Extended Data Figure 8e**). Together, these findings demonstrate that multiple mechanisms underlie  
343 organoid evolution and divergence from the parental tumor, highlight that transcriptional variation is a key  
344 contributor to these differences, and emphasize the importance of deep molecular characterization of patient-  
345 derived models prior to functional application.

### 347 **Alterations to the *ex vivo* culture environment revive the basal state in organoids**

348  
349 Having demonstrated that distinct expression states as well as the local microenvironment co-vary across the  
350 basal to classical axis, we reasoned that different conditions may be needed to preserve basal versus classical  
351 transcriptional heterogeneity. Comparing bulk RNA expression data from patient tumors (n=219), organoids  
352 (n=44) and cell lines (n=49, CCLE) provided evidence that culture conditions can profoundly influence  
353 transcriptional state.<sup>12,13,47</sup> Indeed, most organoid models recapitulate the classical phenotype while cell lines  
354 mirror basal expression patterns (**Figure 6a**). To isolate the effects of extracellular matrix dimensionality from  
355 media formulation, we cultured established 3-dimensional (3D) PDAC organoid models (n=4) as 2-dimensional  
356 (2D) cell lines on tissue culture plastic in the same organoid media and noted that this had little effect on  
357 transcriptional subtype across the models tested (**Extended Data Figure 9a**). We then hypothesized that  
358 multiple components within standard organoid media<sup>10,33</sup>, including WNT3A, R-SPONDIN-1, FGF10, and TGF  
359 and BMP pathway inhibitors such as NOGGIN and A-8301, may drive tumor cells toward more classical  
360 phenotypes in organoid culture. When established organoid models (n = 4) were grown for 1 week in reduced  
361 medium without any additives ("stripped" media, containing only Glutamax, anti-microbials, HEPES buffer, and  
362 Advanced DMEM/F12 media; **Figure 6b**; see **Methods**), we observed a significant increase in basal gene  
363 expression across single cells (**Figure 6c**;  $P < 0.0001$ ), as well as coordinated sample-level shifts to a more  
364 basal phenotype in each model, in some cases returning to levels observed in the parental biopsy (**Figure 6d**).  
365 This shift was less pronounced in the model derived from the most classical tumor (PANFR0489, pink outline;  
366 **Figure 6d**; **Extended Data Figure 9b**). Although there was an appreciable effect on the fraction of cycling cells  
367 in the stripped media (**Figure 6e**, far right), the organoids continued to grow under these conditions (**Extended**  
368 **Data Figure 9c**). These responses were unlikely to be driven by acute selection since the CNV profiles between  
369 the conditions remained stable within this timeframe (**Figure 6e**). Collectively, these observations provide

evidence for significant *ex vivo* tumor cell plasticity in response to microenvironmental cues and suggest that organoid and cell line culture conditions can be further optimized to recapitulate clinically relevant *in vivo* tumor cell states.

## DISCUSSION

This study demonstrates the precision afforded by scRNA-seq for categorizing and phenotyping relevant malignant and non-malignant cell populations in metastatic PDAC. In the malignant compartment, we confirmed the basal-like and classical transcriptional subtyping framework; however, we found that these subtypes exist on a continuum and include a newly identified “hybrid” phenotype. We show at both the RNA and protein level that most tumors are comprised of all three phenotypes and exhibit notable intratumoral heterogeneity in two ways: (i) basal or classical phenotypes in discrete cells but co-occurring in the same tumor, consistent with a recent report<sup>11</sup>, and (ii) co-expression of both states in the same single cell (hybrid cells). Importantly, the identification of these hybrid cells in human tumor biopsies suggests that interconversion may be possible between the classical and basal subtypes. Basal tumor cells exhibit mesenchymal and stem-like features, including TGF- $\beta$  pathway activation and evidence for WNT signaling. In this tissue context, WNT signaling is likely mediated through the expression of WNT7B and/or WNT10A as these were the only ligands consistently expressed in the cells we captured. WNT7B is a key developmental signal for pancreatic progenitor proliferation, normal morphogenesis, and mesenchymal expansion, and its expression evokes the possibility that basal tumor cells may share similarities with a discrete subset of early pancreatic progenitors.<sup>48</sup> Several studies have suggested a role for WNT signaling in supporting proliferation and cell state specification in PDAC models, but more experimentation is needed to clarify its impact.<sup>41,49,50</sup> Given that PDAC transcriptional subtypes have been associated with differential response to chemotherapy<sup>3,7-10</sup>, these new insights into PDAC subtype heterogeneity and their associated biologies have important implications for understanding therapy response in clinical trials.

In coordination with malignant cell phenotypes, non-malignant cells establish subtype-specific local immune microenvironments within the PDAC metastatic niche. Our observations support a model wherein classical tumors exhibit greater chemokine signaling and concomitant immune infiltration. Although this has been hypothesized previously<sup>2,4,6</sup>, the specific cell types and their phenotypes have remained elusive. Our single-cell dataset clarifies this relationship and identifies a classical TME enriched for endothelial cells and specific myeloid and lymphoid cell types. In the lymphoid compartment, surprisingly, we observed cytotoxic signaling that originates primarily from activated NK cells, suggesting a dominant role for innate immune function in the classical metastatic niche. Conversely, the basal microenvironment is optimally tuned for immune suppression/evasion, which may contribute to the overall lower survival seen in this subtype. The relative paucity of CD4<sup>+</sup> T cells found in basal tumors suggests exclusion, possibly driven by the higher levels of TGF gene expression in basal contexts. Somewhat unexpectedly, we found evidence of terminally exhausted CD8<sup>+</sup> T cells in only two basal tumors, and, in most cases, both basal and classical tumors exist in a CD8<sup>+</sup> T-cell progenitor-restricted state. Basal tumor cells exhibited higher levels of IFN response gene expression compared with

407 classical tumors, suggesting exposure to, and potential tolerance of, the presence of activated T cells.<sup>39,40</sup> Basal  
408 tumor cells also shape the myeloid compartment by secreting *CSF1* and *IL34*, with concomitant  
409 microenvironmental increase in *C1QC+* TAM populations that skew towards a tumor supportive, anti-  
410 inflammatory phenotype. Notably, even within basal tumors, those with the most mesenchymal characteristics  
411 possessed the most potent immune-evasive phenotypes, suggestive of additional layers of variation even within  
412 the basal subtype.

413 Comparison of matched biopsies and organoids revealed relative preservation of genomic features in  
414 most organoid models, as has previously been demonstrated<sup>10,35</sup>, but significant deviation in basal/classical  
415 transcriptional state. While classical phenotypes were relatively better preserved, we note strong selection  
416 against the basal state under standard organoid media conditions. Serial sampling of organoid models across  
417 successive passages demonstrated both phenotypic drift and subclonal outgrowth, such that the dominant  
418 clones in some later passage models were only present at low frequencies in the parent tumors. Despite the  
419 bias toward classical phenotypes in organoid culture, the rare emergence of basal clones at late passages  
420 (PANFR0575; **Figure 5e**) suggests that genotype, in addition to microenvironment, may influence transcriptional  
421 plasticity. However, resolution is an important limitation of our clonal tracing, as we cannot comment directly on  
422 variation/selection for single mutations. While our findings may explain some of the limitations observed when  
423 using PDAC organoid models to predict clinical responses<sup>10,35</sup>, they also highlight the significant phenotypic  
424 plasticity and adaptability of PDAC cells and, moreover, the utility of primary tissue and matched model  
425 comparisons for understanding these features of tumor biology. Interestingly, established PDAC cell lines exhibit  
426 predominantly basal phenotypes, but changing matrix dimensionality (2D versus 3D culture) alone did not alter  
427 malignant organoid transcriptional phenotypes along the basal-classical axis, implying that variation in adhesive  
428 context may affect some but not all biologic behaviors. Encouragingly, the basal phenotype could be recovered  
429 by removing exogenous factors from the standard culture media, setting the stage for further optimization of  
430 these conditions to adequately support intratumoral heterogeneity and growth.<sup>51</sup> These results highlight that *ex*  
431 *vivo* model growth may not necessarily equate to model fidelity and suggest that experimental conditions,  
432 heterogeneity, and plasticity all influence the phenotype of patient-derived organoids.<sup>32,52</sup>

433 In sum, we show how scRNA-seq can be employed to clarify the structure of the PDAC metastatic niche  
434 and uncover formerly unappreciated relationships between tumor transcriptional phenotype and the local  
435 immune microenvironment. Although traditionally thought of as a uniformly “immune-cold” tumor, our findings  
436 highlight that the immune microenvironment in PDAC harbors a layer of unappreciated complexity closely linked  
437 to tumor cell transcriptional subtype that may provide new avenues for therapeutic targeting. Specifically, TAM-  
438 directed therapies, such as anti-CSF1R antibodies, could be employed to selectively target transcriptional-  
439 subtype-associated populations.<sup>42,53-55</sup> However, while basal tumors associate with a potentially sensitive  
440 CSF1R-expressing population (*C1QC+* TAM), classical tumors harbor TAMs that are resistant to such therapies  
441 (*SPP1+* TAM).<sup>42</sup> Thus, just as we consider combinations to target malignant states, the TME will also likely  
442 require tailored combination therapies. These findings provide rationale for future clinical trials to employ high-  
443 resolution phenotyping of malignant and non-malignant cells to stratify patients and track tumor evolution in

444 response to therapy. While organoid platforms represent a transformative technology to develop patient-specific  
445 tumor models, we demonstrate that some organoid models show a high degree of plasticity and that both their  
446 genotype and transcriptional phenotype must be understood to enable their optimal use in personalized  
447 medicine. Finally, we provide a framework for relating malignant cells, the TME, and patient-derived model  
448 systems that may be applicable in other tumor types with clinically relevant transcriptional variation across the  
449 malignant and microenvironmental landscape.

## REFERENCES

450

451

- 452 1 Hyman, D. M., Taylor, B. S. & Baselga, J. Implementing Genome-Driven Oncology. *Cell* **168**, 584-599,  
453 doi:10.1016/j.cell.2016.12.015 (2017).
- 454 2 Collisson, E. A., Bailey, P., Chang, D. K. & Biankin, A. V. Molecular subtypes of pancreatic cancer. *Nat*  
455 *Rev Gastroenterol Hepatol* **16**, 207-220, doi:10.1038/s41575-019-0109-y (2019).
- 456 3 Collisson, E. A. *et al.* Subtypes of pancreatic ductal adenocarcinoma and their differing responses to  
457 therapy. *Nat Med* **17**, 500-503, doi:10.1038/nm.2344 (2011).
- 458 4 Bailey, P. *et al.* Genomic analyses identify molecular subtypes of pancreatic cancer. *Nature* **531**, 47-52,  
459 doi:10.1038/nature16965 (2016).
- 460 5 Moffitt, R. A. *et al.* Virtual microdissection identifies distinct tumor- and stroma-specific subtypes of  
461 pancreatic ductal adenocarcinoma. *Nat Genet* **47**, 1168-1178, doi:10.1038/ng.3398 (2015).
- 462 6 Puleo, F. *et al.* Stratification of Pancreatic Ductal Adenocarcinomas Based on Tumor and  
463 Microenvironment Features. *Gastroenterology* **155**, 1999-2013 e1993, doi:10.1053/j.gastro.2018.08.033  
464 (2018).
- 465 7 Porter, R. L. *et al.* Epithelial to mesenchymal plasticity and differential response to therapies in pancreatic  
466 ductal adenocarcinoma. *Proc Natl Acad Sci U S A*, doi:10.1073/pnas.1914915116 (2019).
- 467 8 Aung, K. L. *et al.* Genomics-Driven Precision Medicine for Advanced Pancreatic Cancer: Early Results  
468 from the COMPASS Trial. *Clin Cancer Res* **24**, 1344-1354, doi:10.1158/1078-0432.CCR-17-2994 (2018).
- 469 9 O'Kane, G. M. *et al.* GATA6 Expression Distinguishes Classical and Basal-like Subtypes in Advanced  
470 Pancreatic Cancer. *Clin Cancer Res*, doi:10.1158/1078-0432.CCR-19-3724 (2020).
- 471 10 Tiriác, H. *et al.* Organoid Profiling Identifies Common Responders to Chemotherapy in Pancreatic  
472 Cancer. *Cancer Discov* **8**, 1112-1129, doi:10.1158/2159-8290.CD-18-0349 (2018).
- 473 11 Chan-Seng-Yue, M. *et al.* Transcription phenotypes of pancreatic cancer are driven by genomic events  
474 during tumor evolution. *Nat Genet* **52**, 231-240, doi:10.1038/s41588-019-0566-9 (2020).
- 475 12 Cancer Genome Atlas Research Network. Electronic address, a. a. d. h. e. & Cancer Genome Atlas  
476 Research, N. Integrated Genomic Characterization of Pancreatic Ductal Adenocarcinoma. *Cancer Cell*  
477 **32**, 185-203 e113, doi:10.1016/j.ccell.2017.07.007 (2017).
- 478 13 Aguirre, A. J. *et al.* Real-time Genomic Characterization of Advanced Pancreatic Cancer to Enable  
479 Precision Medicine. *Cancer Discov* **8**, 1096-1111, doi:10.1158/2159-8290.CD-18-0275 (2018).
- 480 14 Connor, A. A. *et al.* Integration of Genomic and Transcriptional Features in Pancreatic Cancer Reveals  
481 Increased Cell Cycle Progression in Metastases. *Cancer Cell* **35**, 267-282 e267,  
482 doi:10.1016/j.ccell.2018.12.010 (2019).
- 483 15 Venteicher, A. S. *et al.* Decoupling genetics, lineages, and microenvironment in IDH-mutant gliomas by  
484 single-cell RNA-seq. *Science* **355**, doi:10.1126/science.aai8478 (2017).
- 485 16 Tirosh, I. *et al.* Dissecting the multicellular ecosystem of metastatic melanoma by single-cell RNA-seq.  
486 *Science* **352**, 189-196, doi:10.1126/science.aad0501 (2016).
- 487 17 Puram, S. V. *et al.* Single-Cell Transcriptomic Analysis of Primary and Metastatic Tumor Ecosystems in  
488 Head and Neck Cancer. *Cell* **171**, 1611-1624 e1624, doi:10.1016/j.cell.2017.10.044 (2017).
- 489 18 van Galen, P. *et al.* Single-Cell RNA-Seq Reveals AML Hierarchies Relevant to Disease Progression and  
490 Immunity. *Cell* **176**, 1265-1281 e1224, doi:10.1016/j.cell.2019.01.031 (2019).
- 491 19 Kim, C. *et al.* Chemoresistance Evolution in Triple-Negative Breast Cancer Delineated by Single-Cell  
492 Sequencing. *Cell* **173**, 879-893 e813, doi:10.1016/j.cell.2018.03.041 (2018).
- 493 20 Sade-Feldman, M. *et al.* Defining T Cell States Associated with Response to Checkpoint Immunotherapy  
494 in Melanoma. *Cell* **176**, 404, doi:10.1016/j.cell.2018.12.034 (2019).

- 495 21 Patel, A. P. *et al.* Single-cell RNA-seq highlights intratumoral heterogeneity in primary glioblastoma. *Science* **344**, 1396-1401, doi:10.1126/science.1254257 (2014).  
496
- 497 22 Filbin, M. G. *et al.* Developmental and oncogenic programs in H3K27M gliomas dissected by single-cell  
498 RNA-seq. *Science* **360**, 331-335, doi:10.1126/science.aao4750 (2018).
- 499 23 Hovestadt, V. *et al.* Resolving medulloblastoma cellular architecture by single-cell genomics. *Nature* **572**,  
500 74-79, doi:10.1038/s41586-019-1434-6 (2019).
- 501 24 Neftel, C. *et al.* An Integrative Model of Cellular States, Plasticity, and Genetics for Glioblastoma. *Cell*  
502 **178**, 835-849 e821, doi:10.1016/j.cell.2019.06.024 (2019).
- 503 25 Tirosh, I. & Suva, M. L. Dissecting human gliomas by single-cell RNA sequencing. *Neuro Oncol* **20**, 37-  
504 43, doi:10.1093/neuonc/nox126 (2018).
- 505 26 Tirosh, I. *et al.* Single-cell RNA-seq supports a developmental hierarchy in human oligodendroglioma.  
506 *Nature* **539**, 309-313, doi:10.1038/nature20123 (2016).
- 507 27 Elyada, E. *et al.* Cross-Species Single-Cell Analysis of Pancreatic Ductal Adenocarcinoma Reveals  
508 Antigen-Presenting Cancer-Associated Fibroblasts. *Cancer Discov* **9**, 1102-1123, doi:10.1158/2159-  
509 8290.CD-19-0094 (2019).
- 510 28 Bernard, V. *et al.* Single-Cell Transcriptomics of Pancreatic Cancer Precursors Demonstrates Epithelial  
511 and Microenvironmental Heterogeneity as an Early Event in Neoplastic Progression. *Clin Cancer Res*  
512 **25**, 2194-2205, doi:10.1158/1078-0432.CCR-18-1955 (2019).
- 513 29 Ligorio, M. *et al.* Stromal Microenvironment Shapes the Intratumoral Architecture of Pancreatic Cancer.  
514 *Cell* **178**, 160-175 e127, doi:10.1016/j.cell.2019.05.012 (2019).
- 515 30 Siegel, R. L., Miller, K. D. & Jemal, A. Cancer statistics, 2020. *CA Cancer J Clin* **70**, 7-30,  
516 doi:10.3322/caac.21590 (2020).
- 517 31 Drost, J. & Clevers, H. Organoids in cancer research. *Nat Rev Cancer* **18**, 407-418, doi:10.1038/s41568-  
518 018-0007-6 (2018).
- 519 32 Ben-David, U. *et al.* Genetic and transcriptional evolution alters cancer cell line drug response. *Nature*  
520 **560**, 325-330, doi:10.1038/s41586-018-0409-3 (2018).
- 521 33 Boj, S. F. *et al.* Organoid models of human and mouse ductal pancreatic cancer. *Cell* **160**, 324-338,  
522 doi:10.1016/j.cell.2014.12.021 (2015).
- 523 34 Huang, L. *et al.* Ductal pancreatic cancer modeling and drug screening using human pluripotent stem  
524 cell- and patient-derived tumor organoids. *Nat Med* **21**, 1364-1371, doi:10.1038/nm.3973 (2015).
- 525 35 Driehuis, E. *et al.* Pancreatic cancer organoids recapitulate disease and allow personalized drug  
526 screening. *Proc Natl Acad Sci U S A*, doi:10.1073/pnas.1911273116 (2019).
- 527 36 Gierahn, T. M. *et al.* Seq-Well: portable, low-cost RNA sequencing of single cells at high throughput. *Nat*  
528 *Methods* **14**, 395-398, doi:10.1038/nmeth.4179 (2017).
- 529 37 Groger, C. J., Grubinger, M., Waldhor, T., Vierlinger, K. & Mikulits, W. Meta-analysis of gene expression  
530 signatures defining the epithelial to mesenchymal transition during cancer progression. *PLoS One* **7**,  
531 e511136, doi:10.1371/journal.pone.0051136 (2012).
- 532 38 Kim, J. H., Park, S. Y., Jun, Y., Kim, J. Y. & Nam, J. S. Roles of Wnt Target Genes in the Journey of  
533 Cancer Stem Cells. *Int J Mol Sci* **18**, doi:10.3390/ijms18081604 (2017).
- 534 39 Benci, J. L. *et al.* Tumor Interferon Signaling Regulates a Multigenic Resistance Program to Immune  
535 Checkpoint Blockade. *Cell* **167**, 1540-1554 e1512, doi:10.1016/j.cell.2016.11.022 (2016).
- 536 40 Benci, J. L. *et al.* Opposing Functions of Interferon Coordinate Adaptive and Innate Immune Responses  
537 to Cancer Immune Checkpoint Blockade. *Cell* **178**, 933-948 e914, doi:10.1016/j.cell.2019.07.019 (2019).
- 538 41 Seino, T. *et al.* Human Pancreatic Tumor Organoids Reveal Loss of Stem Cell Niche Factor Dependence  
539 during Disease Progression. *Cell Stem Cell* **22**, 454-467 e456, doi:10.1016/j.stem.2017.12.009 (2018).

- 540 42 Zhang, L. *et al.* Single-Cell Analyses Inform Mechanisms of Myeloid-Targeted Therapies in Colon  
541 Cancer. *Cell* **181**, 442-459 e429, doi:10.1016/j.cell.2020.03.048 (2020).
- 542 43 Zilionis, R. *et al.* Single-Cell Transcriptomics of Human and Mouse Lung Cancers Reveals Conserved  
543 Myeloid Populations across Individuals and Species. *Immunity* **50**, 1317-1334 e1310,  
544 doi:10.1016/j.immuni.2019.03.009 (2019).
- 545 44 Miller, B. C. *et al.* Subsets of exhausted CD8(+) T cells differentially mediate tumor control and respond  
546 to checkpoint blockade. *Nat Immunol* **20**, 326-336, doi:10.1038/s41590-019-0312-6 (2019).
- 547 45 Chen, C. *et al.* CXCL5 induces tumor angiogenesis via enhancing the expression of FOXD1 mediated  
548 by the AKT/NF-kappaB pathway in colorectal cancer. *Cell Death Dis* **10**, 178, doi:10.1038/s41419-019-  
549 1431-6 (2019).
- 550 46 Li, A. *et al.* Overexpression of CXCL5 is associated with poor survival in patients with pancreatic cancer.  
551 *Am J Pathol* **178**, 1340-1349, doi:10.1016/j.ajpath.2010.11.058 (2011).
- 552 47 Ghandi, M. *et al.* Next-generation characterization of the Cancer Cell Line Encyclopedia. *Nature* **569**,  
553 503-508, doi:10.1038/s41586-019-1186-3 (2019).
- 554 48 Afelik, S., Pool, B., Schmerr, M., Penton, C. & Jensen, J. Wnt7b is required for epithelial progenitor growth  
555 and operates during epithelial-to-mesenchymal signaling in pancreatic development. *Dev Biol* **399**, 204-  
556 217, doi:10.1016/j.ydbio.2014.12.031 (2015).
- 557 49 Arensman, M. D. *et al.* WNT7B mediates autocrine Wnt/beta-catenin signaling and anchorage-  
558 independent growth in pancreatic adenocarcinoma. *Oncogene* **33**, 899-908, doi:10.1038/onc.2013.23  
559 (2014).
- 560 50 Steinhart, Z. *et al.* Genome-wide CRISPR screens reveal a Wnt-FZD5 signaling circuit as a druggable  
561 vulnerability of RNF43-mutant pancreatic tumors. *Nat Med* **23**, 60-68, doi:10.1038/nm.4219 (2017).
- 562 51 Mead, B. E. *et al.* Harnessing single-cell genomics to improve the physiological fidelity of organoid-  
563 derived cell types. *BMC Biol* **16**, 62, doi:10.1186/s12915-018-0527-2 (2018).
- 564 52 Ben-David, U., Beroukhi, R. & Golub, T. R. Genomic evolution of cancer models: perils and  
565 opportunities. *Nat Rev Cancer* **19**, 97-109, doi:10.1038/s41568-018-0095-3 (2019).
- 566 53 Balachandran, V. P., Beatty, G. L. & Dougan, S. K. Broadening the Impact of Immunotherapy to  
567 Pancreatic Cancer: Challenges and Opportunities. *Gastroenterology* **156**, 2056-2072,  
568 doi:10.1053/j.gastro.2018.12.038 (2019).
- 569 54 Zhu, Y. *et al.* CSF1/CSF1R blockade reprograms tumor-infiltrating macrophages and improves response  
570 to T-cell checkpoint immunotherapy in pancreatic cancer models. *Cancer Res* **74**, 5057-5069,  
571 doi:10.1158/0008-5472.CAN-13-3723 (2014).
- 572 55 Candido, J. B. *et al.* CSF1R(+) Macrophages Sustain Pancreatic Tumor Growth through T Cell  
573 Suppression and Maintenance of Key Gene Programs that Define the Squamous Subtype. *Cell Rep* **23**,  
574 1448-1460, doi:10.1016/j.celrep.2018.03.131 (2018).

575

576

577



Figure 1

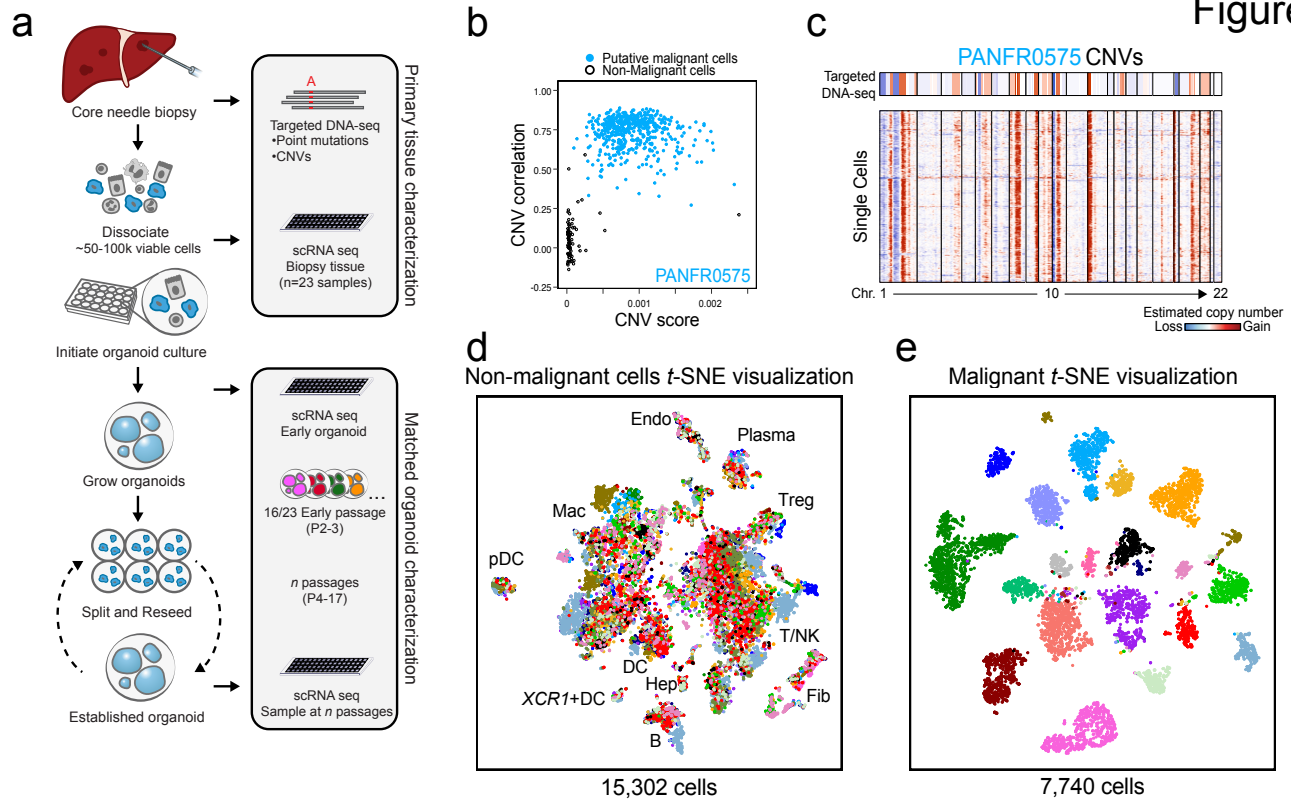

578 **Figure 1. A clinical pipeline for matched single-cell RNA-seq and organoid generation from metastatic**  
579 **biopsies. a**, Pipeline for collecting patient samples, dissociation and allocation for scRNA-seq, and parallel  
580 organoid development. **b**, CNV correlation (to averaged top 5% of altered cells) versus CNV score (mean square)  
581 for each single cell in PANFR0575. Cells are colored by their putative class: malignant (light blue) or non-  
582 malignant (empty black circles). **c**, Bulk targeted DNA-seq (top) and single-cell (rows, bottom) CNV profiles  
583 arranged by chromosome (columns). **d, e**, *t*-distributed stochastic neighbor embedding (*t*-SNE) visualization for  
584 non-malignant (**d**) and malignant (**e**) single cells in the biopsy cohort. Cells are colored by patient. Endo,  
585 Endothelial; Fib, Fibroblast; B, B-cell; Hep, Hepatocyte; DC, Dendritic cell; pDC, Plasmacytoid dendritic cell;  
586 Mac, Macrophage; T, T-cell; NK, Natural killer cell.

587

588

Figure 2

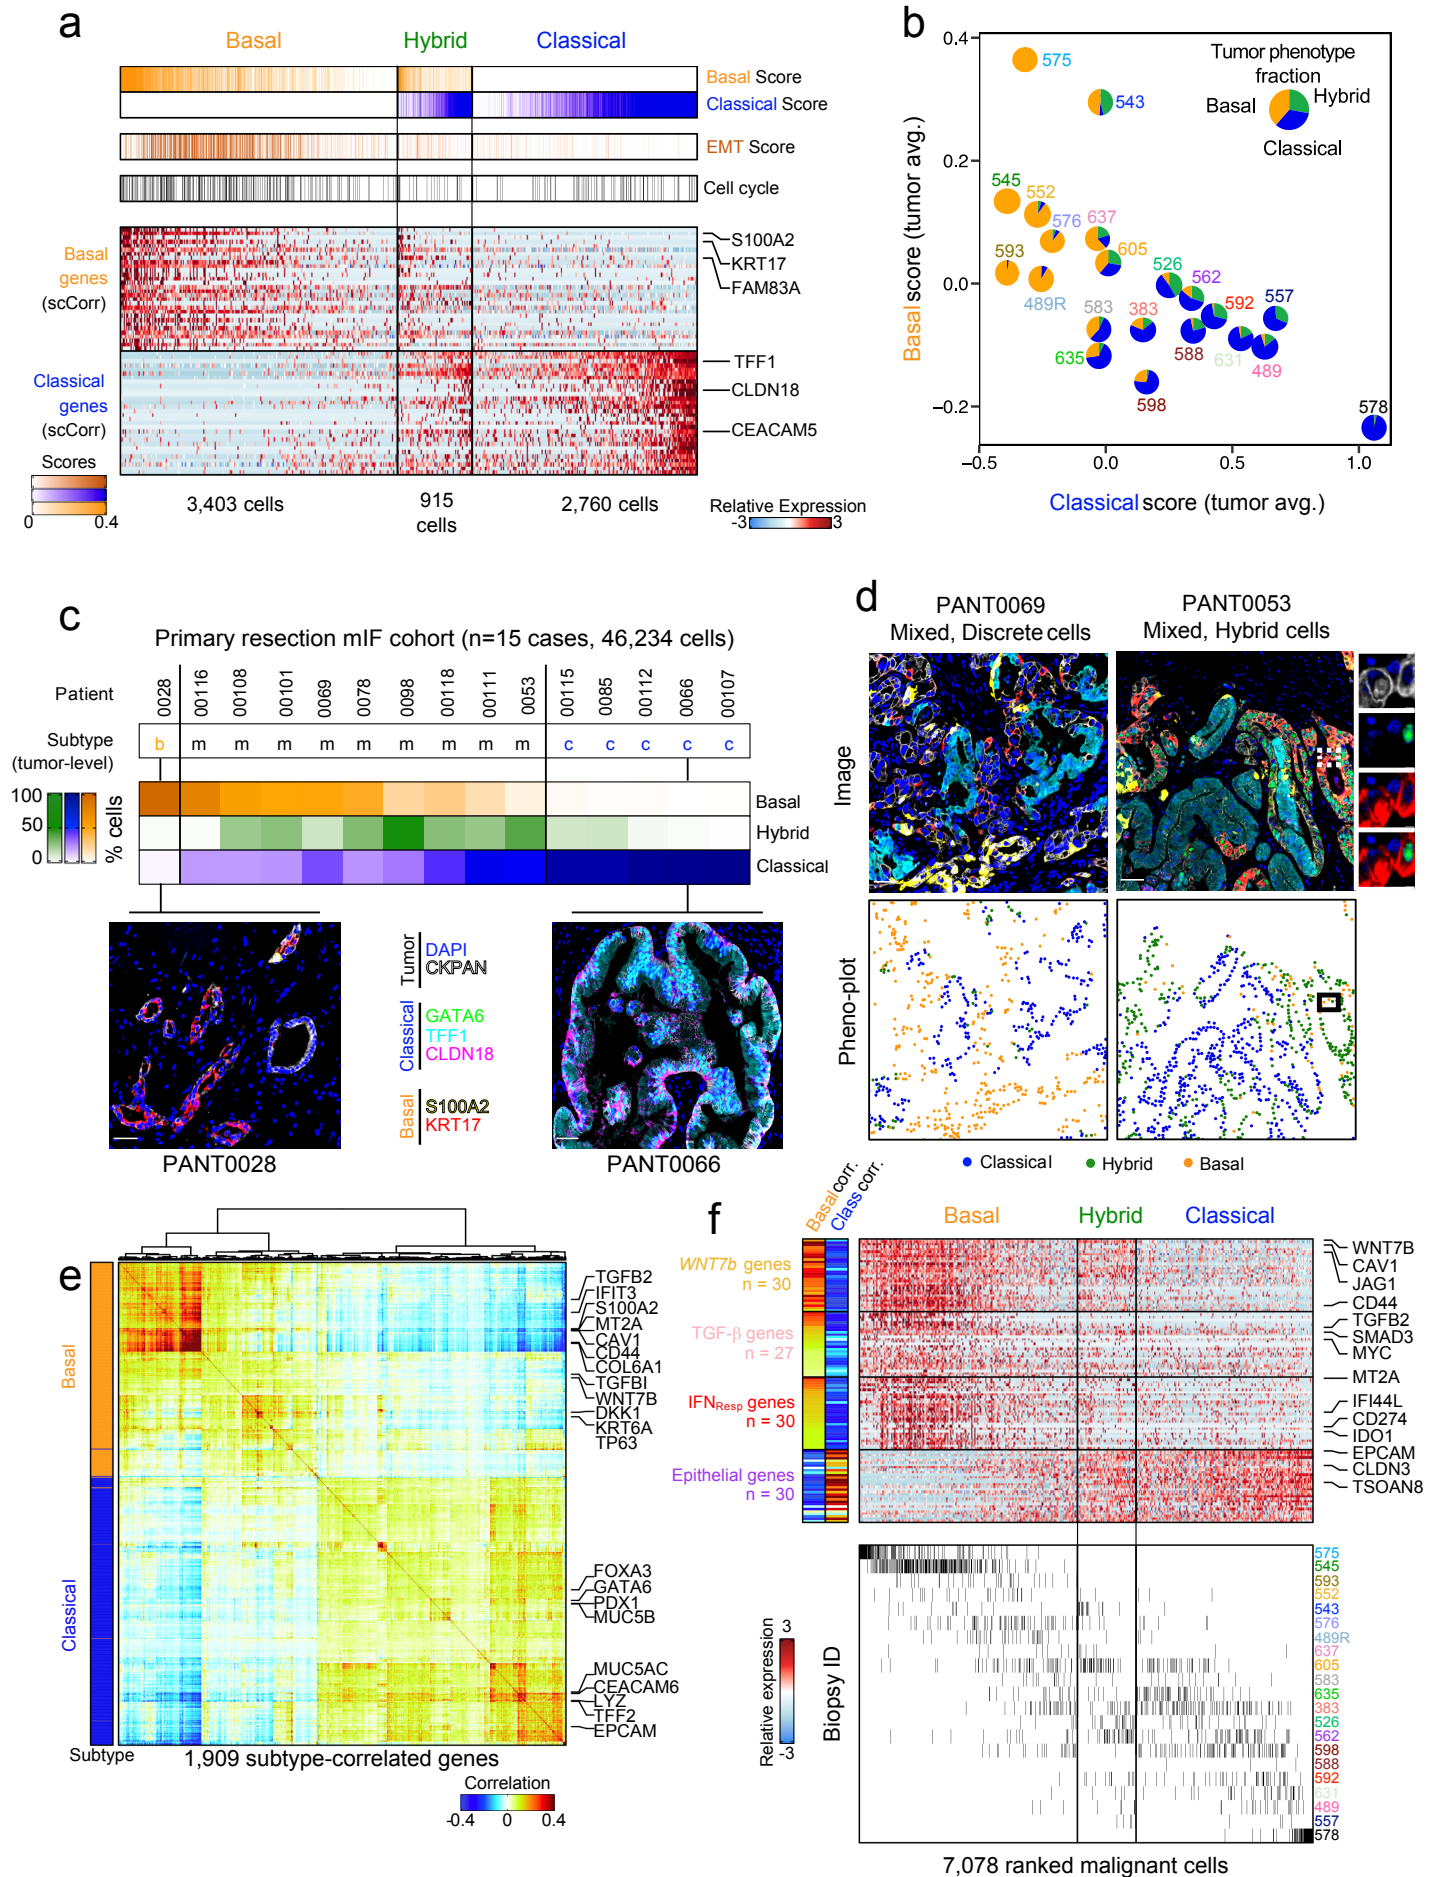

589 **Figure 2. Basal, classical, and hybrid transcriptional states in metastatic PDAC.** **a**, Heatmap depicts the  
590 expression of basal and classical genes (n=30 each, **Methods**) across all malignant cells. EMT, basal, classical,  
591 and cell cycle programs are indicated. **b**, PDAC tumors are arranged by their average classical (x-axis) and  
592 basal (y-axis) scores. Points are pie charts summarizing the malignant subtype composition within each biopsy.  
593 **c**, Composition of each tumor (% cells) across the three expression subtypes in the primary resection cohort  
594 (n=15 cases) determined by multiplexed immunofluorescence (b, basal; m, mixed; c, classical). Representative  
595 images for strongly polarized tumors are shown (bottom). **d**, Representative mixed tumor images (top) and  
596 corresponding pheno-plots (bottom). Pheno-plot points correspond to cells in the image above and are colored  
597 by their subtype, marker negative cells are not visualized. Zoom panel on far right (dotted white box, image; solid  
598 black box, pheno-plot) shows juxtaposed hybrid and basal cells. **e**, Pairwise correlation of genes significantly  
599 associated with basal or classical expression states. Left bar indicates the subtype association of each gene  
600 (orange, basal; blue, classical). **f**, Heatmap shows the relative expression of the indicated basal and classical-  
601 associated programs, cells are ordered as in **a**. Left heat bar indicates each gene's correlation to either basal or  
602 classical subtypes, and the range for these values is the same as in **e**. Bottom plot indicates each single-cell's  
603 biopsy of origin.

Figure 3

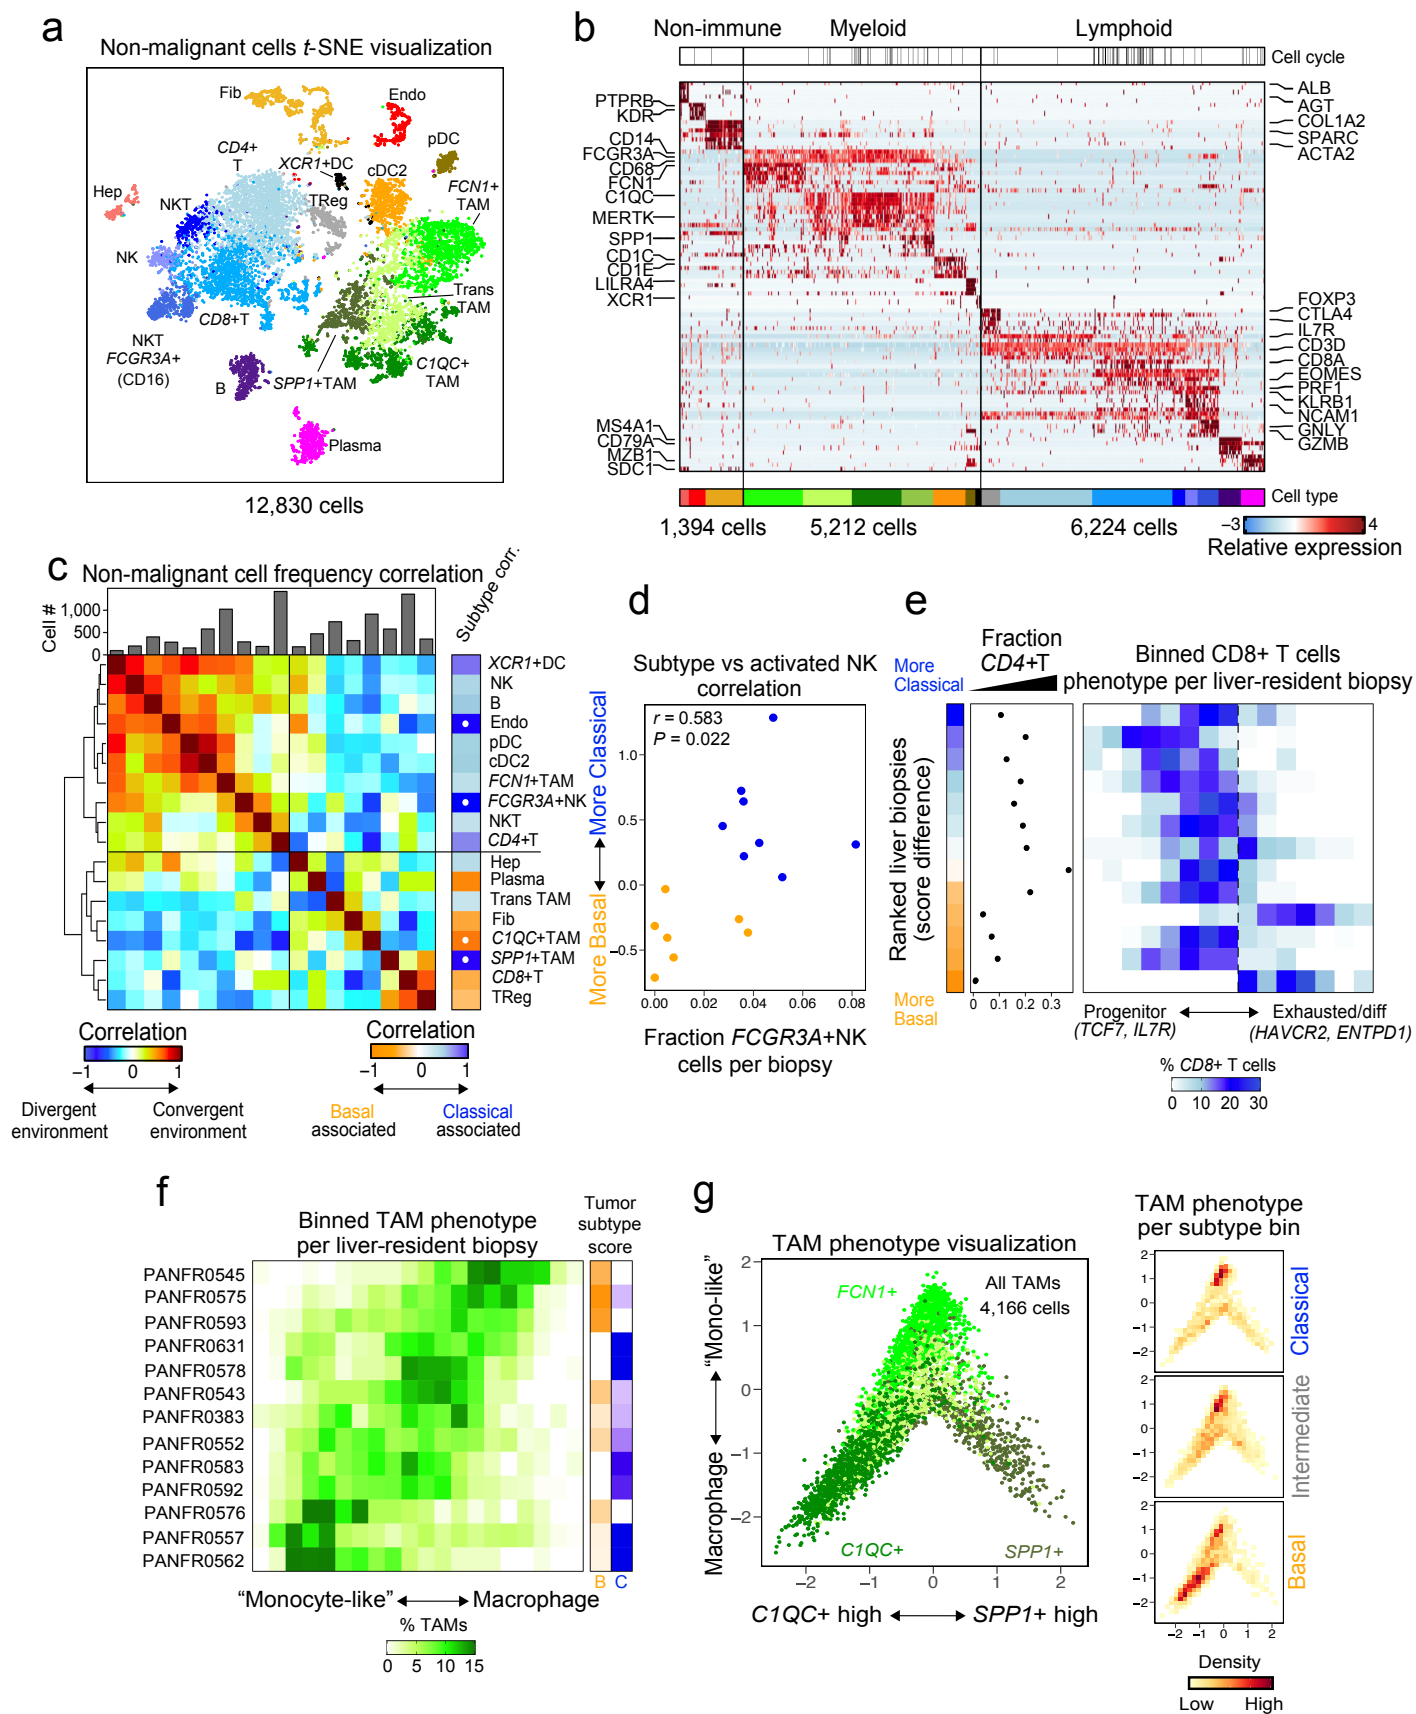

604 **Figure 3. Asymmetric distribution of immune phenotypes across the basal to classical continuum. a, t-**  
605 **SNE visualization of non-malignant cells identified in the metastatic microenvironment, abbreviations are the**  
606 **same as in Figure 1d (TAM, tumor associated macrophage; Trans, Transition; NKT, natural killer T cell). b,**  
607 **Heatmap shows the relative expression for select cell type markers. Top bar indicates the binarized cell cycle**  
608 **program (black, cycling) and the bottom color bar corresponds to the cell type colors noted in a. c, Cross-**  
609 **correlational heatmap and hierarchical clustering for similarity in the capture frequency of non-malignant cell**  
610 **types from each biopsy. Rainbow coloration in the main heatmap indicates convergence (yellow to red) or**  
611 **divergence (white to blue) across cell types. Right heat bar indicates preferential association for each cell type**  
612 **with either the basal (orange, negative values) or classical (blue, positive values) malignant transcriptional**  
613 **subtypes. Color ranges for both quantities are Pearson's  $r$ , white dots indicate  $P < 0.05$  for the subtype**  
614 **associations. Top bar chart indicates the total number of cells for each type. d, Scatter plot compares each liver**  
615 **biopsy's position on the basal to classical continuum (y-axis, score difference) to the relative abundance of**  
616 **activated NK cells captured from its microenvironment. Points represent individual biopsies and are colored by**  
617 **their discretized transcriptional subtype ( $n = 15$ ). e, Distribution (blue heat) of CD8+ T cell phenotype across the**  
618 **progenitor to exhausted/differentiated continuum in each liver-resident biopsy. Biopsies are sorted by the score**  
619 **difference (far left heat bar). The corresponding fractional capture of CD4+ T cells is indicated left of the main**  
620 **heat map for each sample. f, Distribution (green heat) of TAM phenotype for the macrophages captured in each**  
621 **liver biopsy. Biopsies with  $<100$  macrophages were excluded. Heatmap is ranked by average monocyte-like to**  
622 **macrophage skew and both average basal and classical scores are indicated (right). g, Phenotypic hierarchy for**  
623 **TAM subsets using the expression scores for each phenotype across all TAMs captured in the dataset. The**  
624 **distribution (density; high = more TAMs) across the phenotypic hierarchy is visualized (right) according to**  
625 **malignant transcriptional phenotype as in Extended Data Figure 3d.**

Figure 4

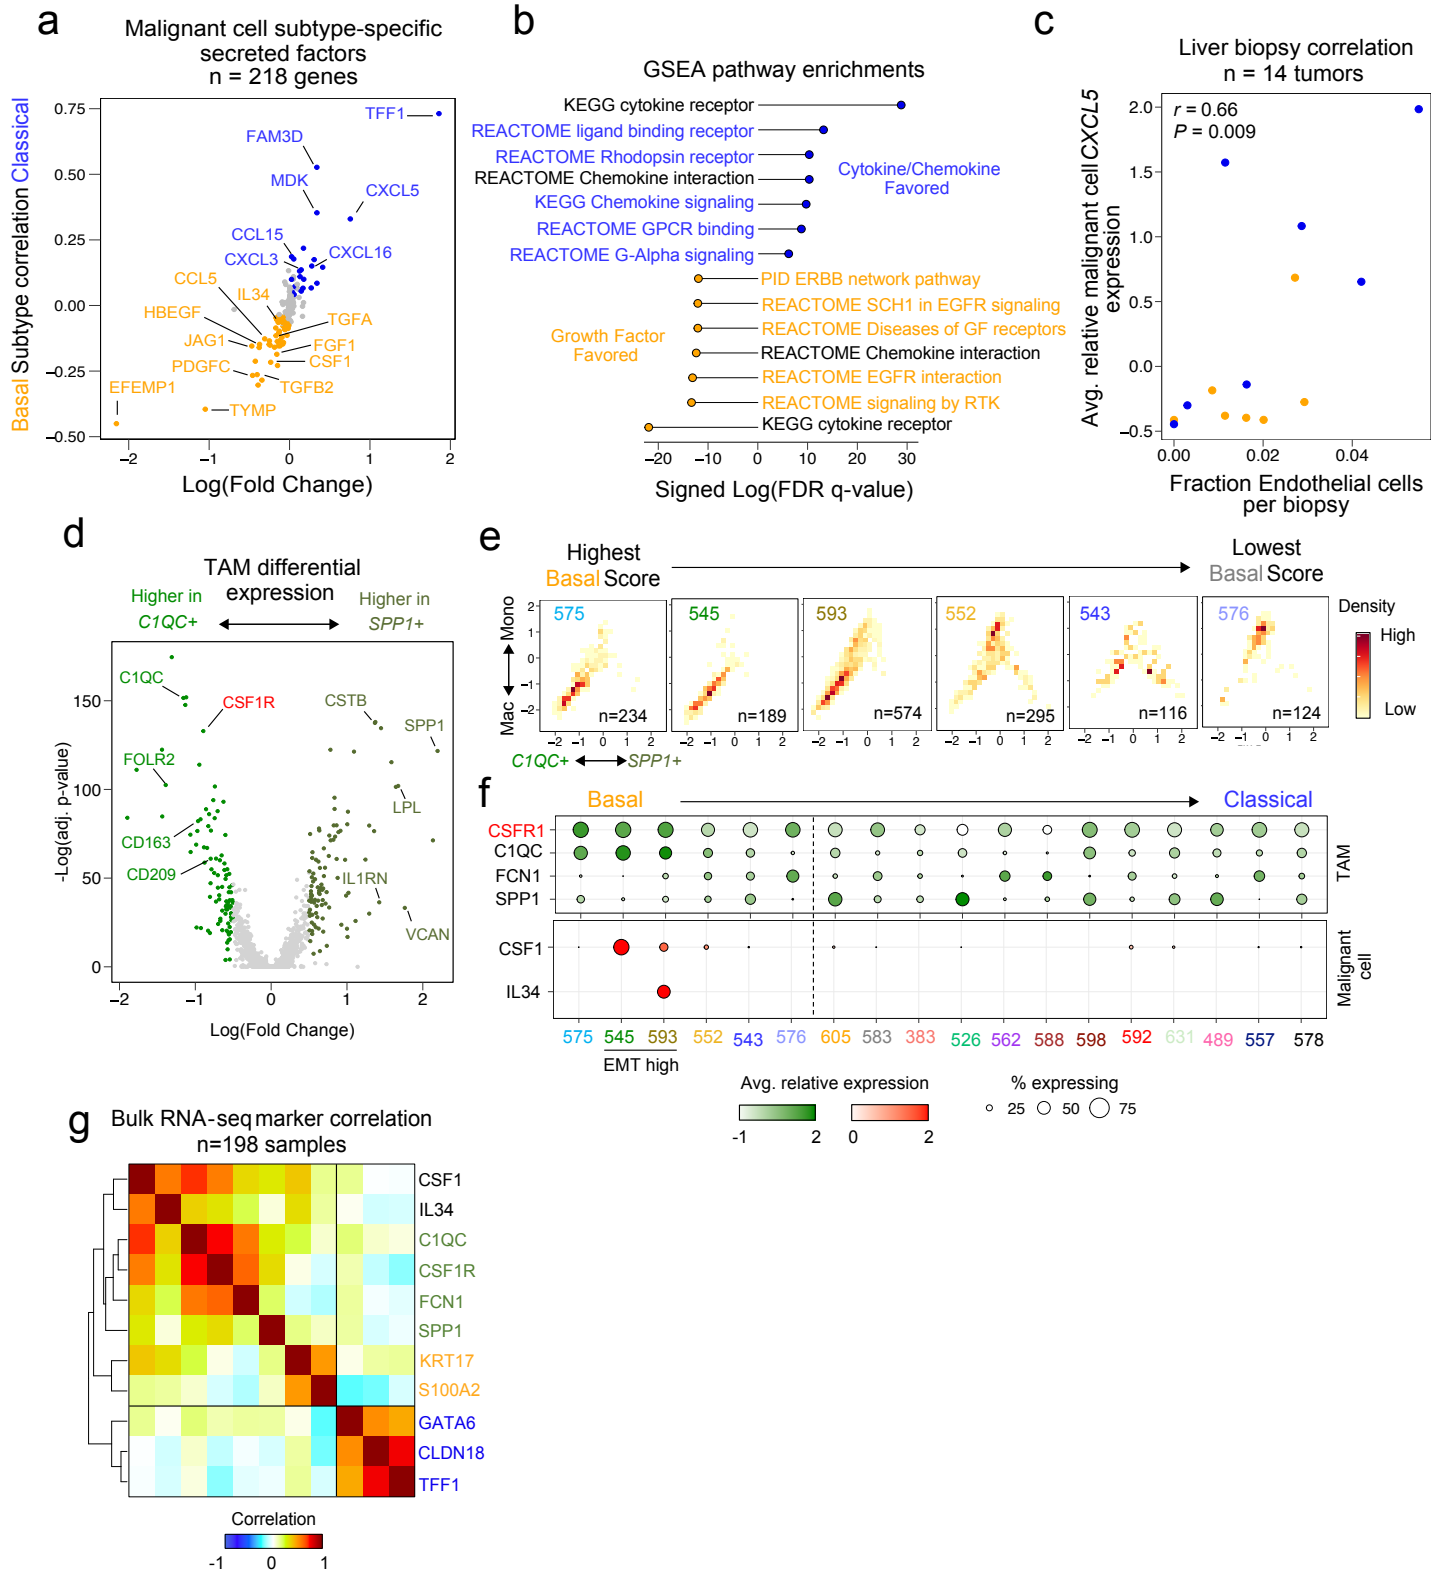

626 **Figure 4. Differential microenvironmental crosstalk shapes subtype-specific metastatic niches. a,**  
627 Scatterplot comparing differential expression (x-axis) and subtype correlation coefficient (y-axis) for the 219  
628 genes annotated as secreted growth factors, cytokines, or chemokines detected in malignant cells. Genes  
629 passing significance are assigned as “subtype specific” for either basal or classical ( $P < 0.05$ , DE;  $P < 0.003$ ,  
630 correlation). **b,** Pathway enrichments for the top genes associated with each subtype. Shared enrichments are  
631 in black, orange and blue denote basal and classical-unique terms, respectively. **c,** Scatterplot comparing the  
632 fraction of endothelial cells captured and the average expression in malignant cells for *CXCL5*. Each point  
633 represents one biopsy (n=14). **d,** Differential expression between the committed TAM subsets *SPP1+* and  
634 *C1QC+*. Genes are colored by their subtype selectivity ( $P < 0.05$ ;  $\text{Log}(\text{Fold Change}) > 0.5$ ). **e,** TAM phenotypic  
635 hierarchy plots for basal subtype tumors (Figure 3g, bottom), split by biopsy and sorted by decreasing basal  
636 score. Heat indicates distribution of total TAMs (bottom right for each plot) per biopsy as in **Figure 3g**. **f,** Dot  
637 plots for TAM (top, green fill) and malignant (bottom, red fill) expression of the indicated genes sorted by basal-  
638 classical polarization. Size of the dot indicates fraction of cells expressing a given gene. Left of the dotted line  
639 are tumors visualized in **e**; basal tumors high for EMT program expression (PANFR0545 and PANFR0593) are  
640 indicated. **g,** Cross-correlation for markers of TAM subsets (green), basal (orange) and classical (blue) markers  
641 used in mIF studies, and putative malignant secreted factors (black).



Figure 5

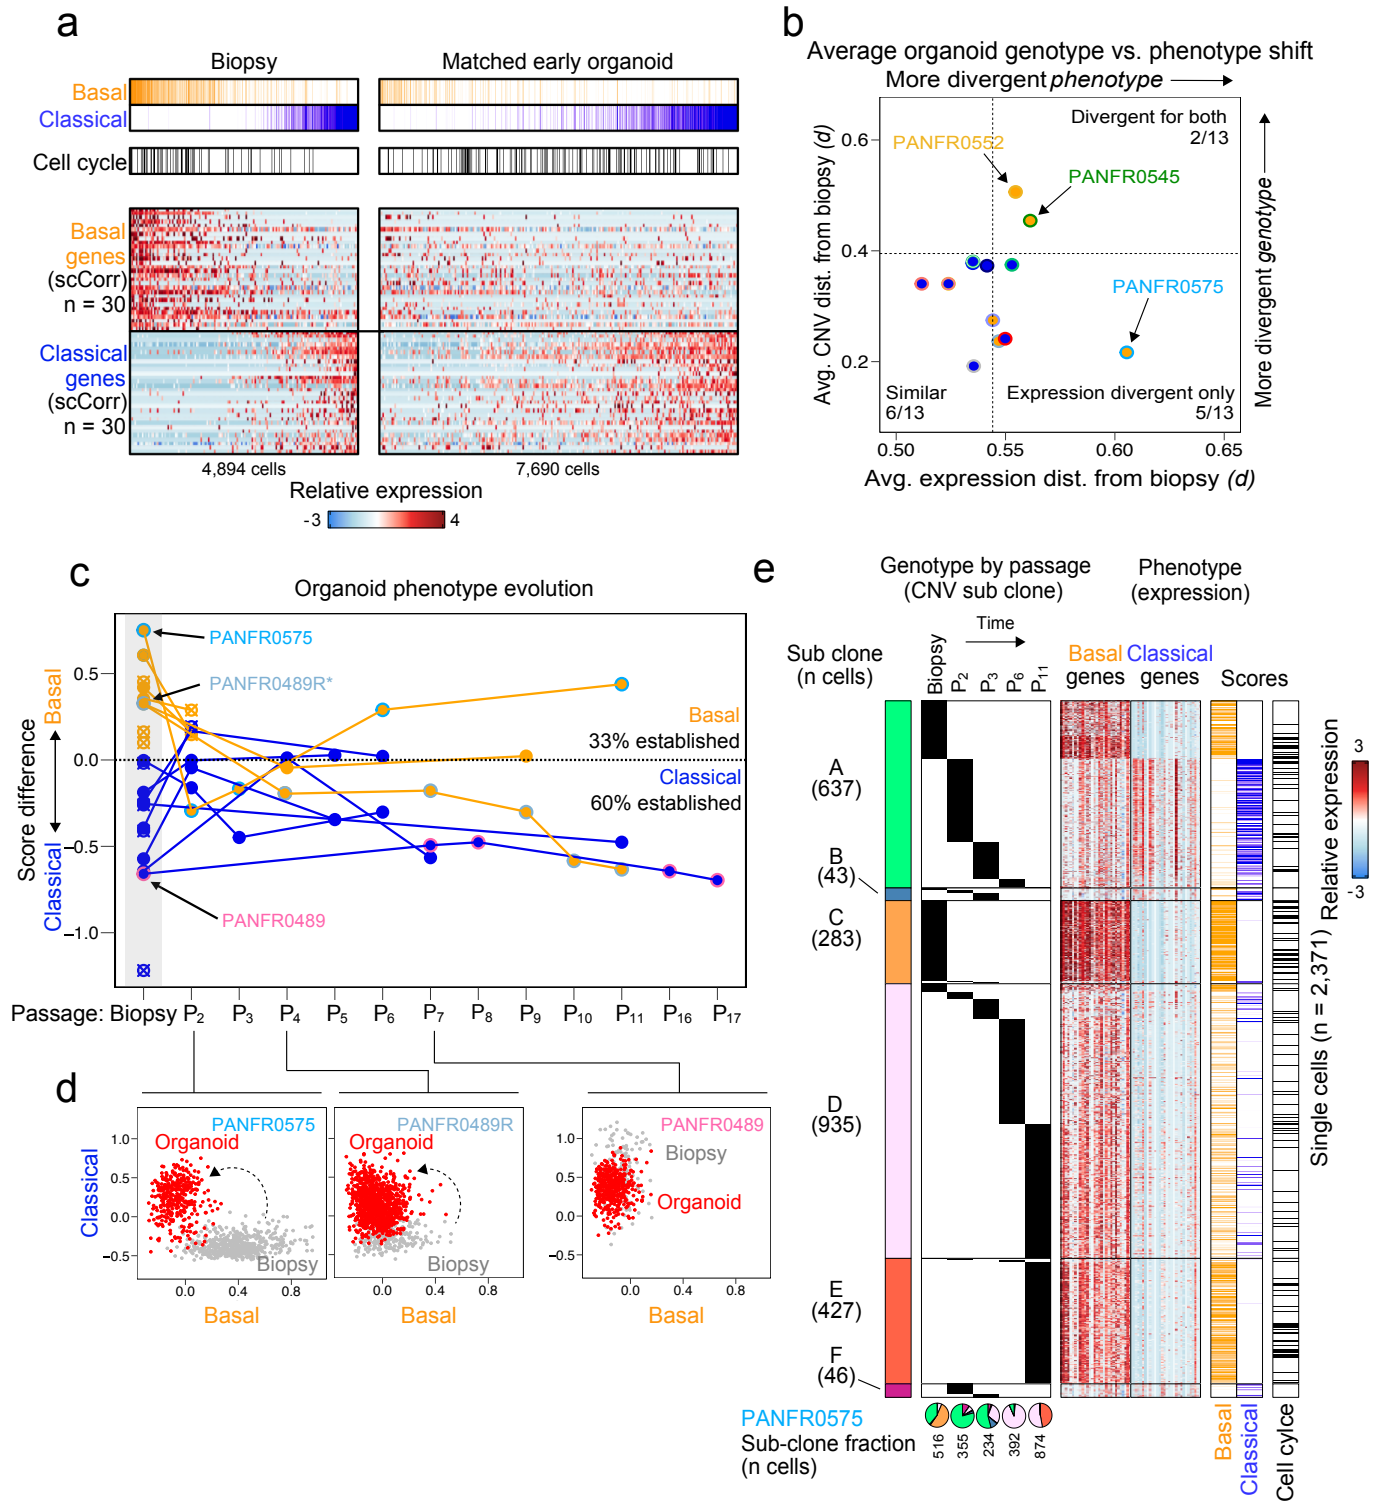

642 **Figure 5. Organoid culture microenvironment selects against the basal state.** **a**, Relative expression for  
643 basal and classical genes in biopsy cells (left) and their matched, early passage organoid cells (n=13 models;  
644 right). **b**, Scatterplot compares the relative contribution of genotypic drift (CNVs, y-axis) versus phenotypic drift  
645 (basal/classical gene expression, x-axis). Both quantities represent distance ( $d = (1-r)/2$ ); higher value = greater  
646 distance) derived from Pearson correlation ( $r$ ). Each point is one organoid/biopsy pair and summarizes the  
647 average  $d$  between organoid cells and their matched initial biopsy. Dotted lines are  $P < 0.05$  comparing average  
648 intra-biopsy (biopsy cells to themselves)  $d$  across the cohort for both metrics. Fill colors denote classification of  
649 original tumor, point outline color is the biopsy identifier. **c**, Line plot for each biopsy and its successive organoid  
650 samples (\*see **Methods**). Points represent the sample averaged score at the indicated timepoints, lines tie  
651 samples derived from the same initial biopsy. Color indicates if the original biopsy was initially measured as  
652 basal (orange) or classical (blue). Colored point outlines denote all samples from the indicated original biopsy.  
653 Crossed empty circles indicate when a sample failed to grow. **d**, Representative scatterplots for single-cell basal  
654 and classical scores in biopsy (grey) and the indicated organoid passage (red) sample. **e**, Genotype and  
655 phenotype evolution in PANFR0575. Cells are sorted first by their subclone (A-F, color bar far left; **Methods**)  
656 and then sample of origin (Biopsy or organoid, right of subclone color bar;  $P_n$ , Organoid passage number). Each  
657 single cell's corresponding phenotype is shown in the center heatmap and far right expression score bars (Cell  
658 cycle, black). The fraction of each subclone in each sample is indicated with pie charts at the bottom, cell  
659 numbers per sample are below.

Figure 6

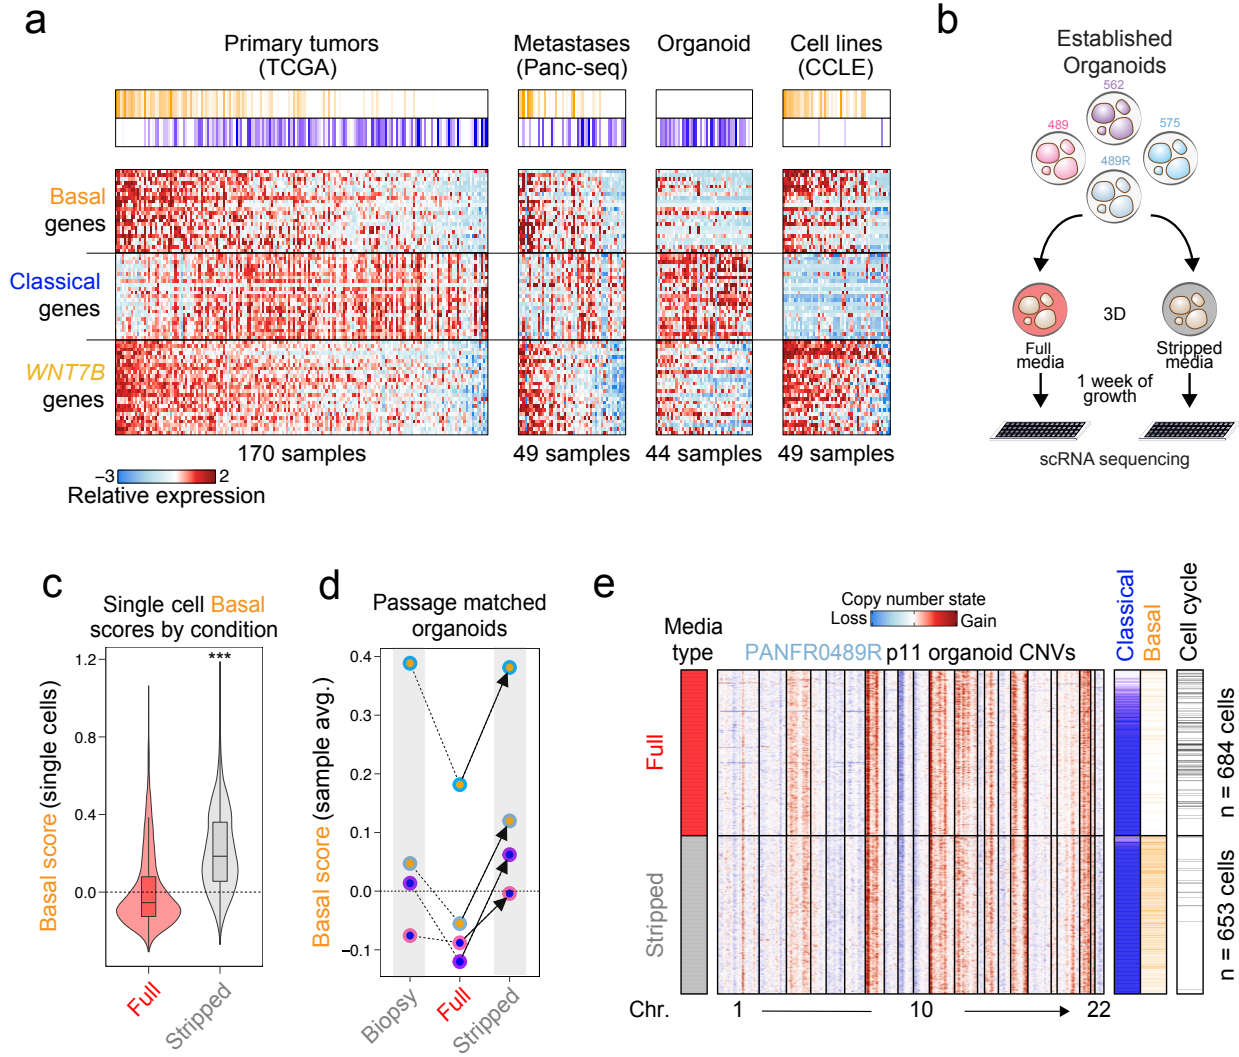

660 **Figure 6. Recovery of the basal state in altered media conditions.** **a**, Relative expression for 90 genes  
661 representing basal, classical, and *WNT7B* expression programs across bulk RNA-seq samples from primary  
662 resections (TCGA) and metastatic biopsies (Panc-Seq), as well as organoid and cell line (CCLE) models.  
663 Phenotype scores are indicated and samples are ranked by their score difference. **b**, Schematic for depleted  
664 media experiment. **c**, Single-cell violin plots for basal score in passage matched organoids grown in the indicated  
665 media conditions ( $***P = 2.2 \times 10^{-16}$ ). **d**, Dot plot represents the sample average basal score in the indicated  
666 conditions. Lines tie samples and color outlines indicate sample identity. Each sample's biopsy basal score is  
667 included for reference. **e**, Inferred CNVs, expression scores, and cell cycle status for each cell from either  
668 Stripped (grey) or Full (red) organoid media conditions in the PANFR489R experiment.
